# Supplementary material
Source: PubMed Central journal article supplement (PMC4345379)
Supplement: AEM.03494-14_zam999116084so1.pdf [file AEM.03494-14_zam999116084so1.pdf]

**Table S1.** Sequence differences between *E. coli* K-12 strains W3110-D8 and W3110-D13 compared to that of the *E. coli* K-12 reference genome, NC\_007779.1 .\*

| Position (bp) | Gene                   | Mutation  | Type of Coding Effect | Codon Change               | D8-W | D13-W |
|---------------|------------------------|-----------|-----------------------|----------------------------|------|-------|
|               |                        |           |                       |                            |      |       |
| 547,694       | <b>fdrA → / → ylbF</b> | A→G       | INTERGENIC            | intergenic (+123/-1156)    | 1    | 1     |
| 547,831       | <b>fdrA → / → ylbF</b> | +G        | INTERGENIC INSERTION  | intergenic (+260/-1019)    | 1    | 1     |
| 556,858       | <b>folD ←</b>          | A→T       | MISSENSE              | (CTG→CAG) L36Q             | 1    | 1     |
| 654,214       | <b>insH</b>            | Δ1,199 bp | DELETION              |                            | 1    | 1     |
| 987,574       | <b>ompF ← / ← asnS</b> | G→T       | INTERGENIC            | intergenic (-170/+433)     | 1    | 1     |
| 1,093,686     | <b>ydcT →</b>          | T→C       | MISSENSE              | (GTA→GCA) V130A            | 1    | 1     |
| 1,197,797     | <b>icd →</b>           | C→T       | SILENT                | (CAC→CAT) H366H            | 1    | 1     |
| 1,197,809     | <b>icd →</b>           | C→T       | MISSENSE              | (ACC→ACT) T370T            | 1    | 1     |
| 1,197,822     | <b>icd →</b>           | T→C       | MISSENSE              | (TTA→CTG) L375M            | 1    | 1     |
| 1,197,824     | <b>icd →</b>           | A→G       | MISSENSE              | (TTA→CTG) L375M            | 1    | 1     |
| 1,197,854     | <b>icd →</b>           | C→T       | SILENT                | (AAC→AAT) N385N            | 1    | 1     |
| 1,197,857     | <b>icd →</b>           | G→C       | SILENT                | (GCG→GCC) A386A            | 1    | 1     |
| 1,197,860     | <b>icd →</b>           | A→ G      | SILENT                | (AAA→AAG) K387K            | 2    | 1     |
| 1,197,869     | <b>icd →</b>           | C→T       | SILENT                | (ACC→ACT) T390T            | 2    | 1     |
| 1,197,881     | <b>icd →</b>           | G→A       | SILENT                | (GAG→GAA) E394E            | 2    | 1     |
| 1,519,222     | <b>ydcX →</b>          | G→T       | SILENT                | (GTG→GTT) V40V             | 1    | 1     |
| 1,669,599     | <b>dgsA ←</b>          | Δ1 bp     | DELETION              | coding (680/1221 nt)       | 1    | 1     |
| 1,979,957     | <b>flhD ← / ← insH</b> | G→T       | INTERGENIC            | intergenic (-37/+398)      | 1    | 1     |
| 2,005,401     | <b>fliC ←</b>          | C→T       | MISSENSE              | (GAA→AAA) E115K            | 1    | 1     |
| 2,176,983     | <b>insH</b>            | Δ1,199 bp | DELETION              |                            | 1    | 1     |
| 2,245,455     | <b>yeiB ←</b>          | A→G       | MISSENSE              | (TCG→CCG) S283P            | 1    | 1     |
| 2,320,795     | <b>insD–insC</b>       | Δ1,336 bp | DELETION              |                            | 2    | 1     |
| 2,866,111     | <b>rpoS ← / ← nlpD</b> | A→G       | INTERGENIC            | intergenic (-21/+159)      | 1    | 1     |
| 3,261,134     | <b>insH–[tdcD]</b>     | Δ1,199 bp | DELETION              |                            | 1    | 2     |
| 3,268,825     | <b>yhaC →</b>          | A→G       | MISSENSE              | (ACA→GCA) T186A            | 1    | 1     |
| 3,742,936     | <b>insD–insC</b>       | Δ1,336 bp | DELETION              |                            | 1    | 1     |
| 3,746,911     | <b>insH</b>            | Δ1,199 bp | DELETION              |                            | 1    | 1     |
| 3,750,591     | <b>insH</b>            | Δ1,199 bp | DELETION              |                            | 1    | 2     |
| 3,958,123     | <b>dctA →</b>          | Δ34 bp    | DELETION              | coding (1156-1189/1287 nt) | 1    | 1     |
| 4,310,363     | <b>insH–[alsK]</b>     | Δ1,199 bp | DELETION              |                            | 2    | 1     |
| 4,371,271     | <b>dcuA ← / ← aspA</b> | Δ2 bp     | DELETION              | intergenic (-6/+299)       | 2    | 1     |
| 4,371,272     | <b>dcuA ← / ← aspA</b> | Δ1 bp     | DELETION              | intergenic (-7/+299)       | 1    | 2     |

\*Predicted differences in the two laboratory stock strains resequenced for this study—W3110-D8 (D8-W) as the strain ancestral to the adapted populations; W3110-D13 (D13-W) as another resequenced W3110 strain. The breseq pipeline was used to align sequences to the reference genome, NC\_007779.1. A “1” indicates a confirmed coding effect by breseq and visual genome alignment with IGV (Broad Institute); a “2” indicates a region of low genomic coverage with a possible coding effect.
